# Supplementary material for: Dbx1 controls the development of astrocytes of the intermediate spinal cord by modulating Notch signaling
Source: Oxford University Press journal article supplement (doi:10.1242/dev.200750), 2022-07-11
Supplement: dev200750supp.pdf [file dev200750supp.pdf]

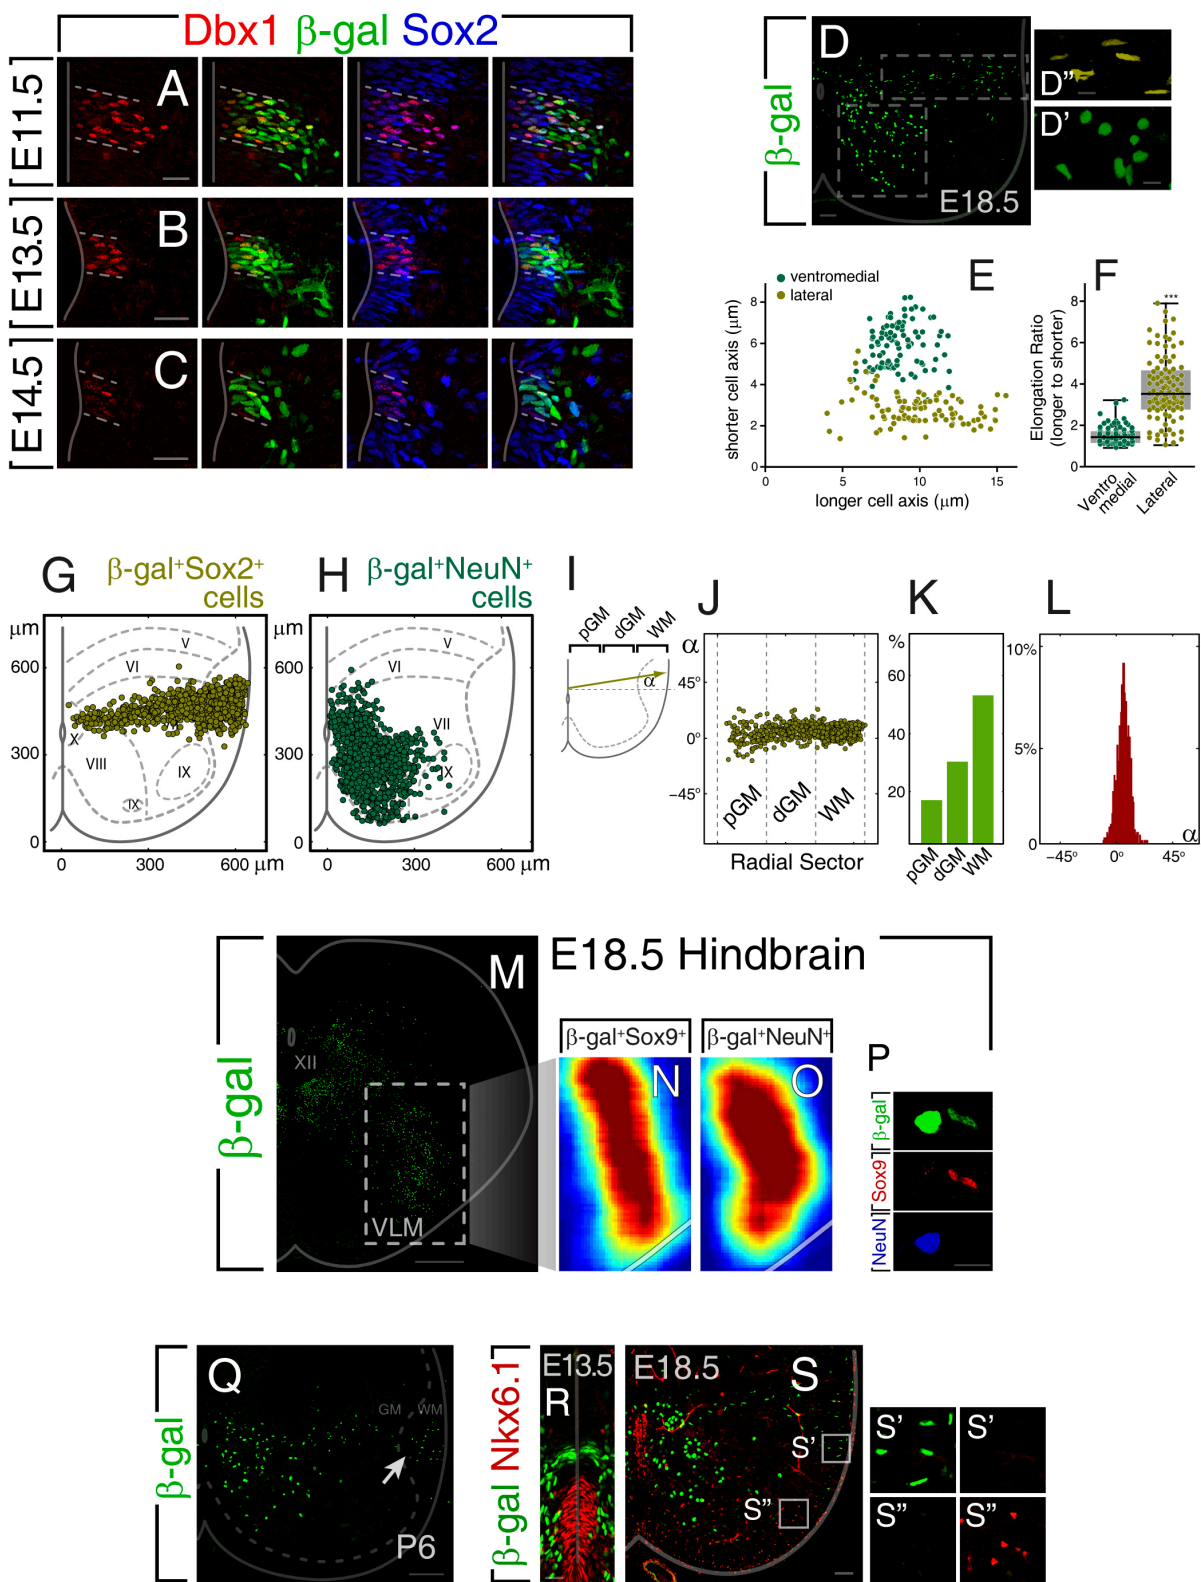

**Fig. S1. Neurons and glial cells are produced from Dbx1<sup>+</sup> progenitors in the spinal cord and hindbrain.**

(A-C) *Dbx1/lacZ* mice faithfully recapitulate Dbx1 expression. Cross sections of *Dbx1/lacZ*<sup>+</sup> spinal cord at the level of the vz p0 domain at E11.5, E13.5 and E14.5 stained for Dbx1,  $\beta$ -gal and Sox2.

(D-F) Ventromedial and lateral  $\beta$ -gal<sup>+</sup> cells have a distinctive nuclear shape. (D) Transverse section of E18.5 *Dbx1/lacZ*<sup>+</sup> spinal cord. Magnifications show  $\beta$ -gal<sup>+</sup> cells positioned in the ventromedial (D') and lateral (D'') spinal regions. (E) Measures of major and minor axis of  $\beta$ -gal<sup>+</sup> nuclei in ventromedial and lateral areas (dotted boxes in D). (F) The elongation ratio, calculated as longer over shorter axis, shows different nuclear shapes (n=100 cell each; \*\*\*p<0.001, Mann-Whitney test).

(G-L) Spatial distribution of Dbx1-derived cells in the spinal cord. (G,H) Distribution of the 775  $\beta$ gal<sup>+</sup>,Sox2<sup>+</sup> and 890  $\beta$ -gal<sup>+</sup>,NeuN<sup>+</sup> cells used to produce the density map in Fig. 1 K,L with Rexed's *laminae* reference. (I-L)  $\beta$ -gal<sup>+</sup>,Sox2<sup>+</sup> cells are found across the spinal cord GM and WM and are included in a 21° slice. The x-y arrangement of cells was transformed and analyzed in angular and radial coordinates. Distribution of  $\beta$ -gal<sup>+</sup>,Sox2<sup>+</sup> cells along the radial axis in pGM, dGM and WM (K). Angle histogram plot of  $\beta$ -gal<sup>+</sup>,Sox2<sup>+</sup> cells (L) shows that 95% of cells are included in a slice section spanning 21° (corresponding to 4 SDs).

(M-P) Dbx1-derived cells in the hindbrain comprise both neuronal and glial populations. (M) Transversal section of E18.5 hindbrain of *Dbx1/lacZ*<sup>+</sup> mouse. (N,O) Density maps of the ventrolateral medulla (VLM, dotted box in M), based on positions of 685  $\beta$ -gal<sup>+</sup>,Sox9<sup>+</sup> cells and 1284  $\beta$ -gal<sup>+</sup>,NeuN<sup>+</sup>, shows that Dbx1-derived neurons and glia occupy similar territories, with 34.3±4.5% of  $\beta$ -gal<sup>+</sup> cells expressing Sox9. (P) Magnification of 2 Sox9<sup>+</sup> or NeuN<sup>+</sup> cells in the VLM.

(Q) Cross section of P6 spinal cord shows that the regional allocation of  $\beta$ -gal<sup>+</sup> astroglial cells is maintained postnatally. Arrows point the intermediate-lateral  $\beta$ -gal<sup>+</sup> population settled in the GM and the WM.

(R,S) Dorsal-ventral organization of glial populations reflects vz patterning. E13.5 p0 progenitors are dorsal to Nkx6.1<sup>+</sup> domains. At E18.5.  $\beta$ -gal<sup>+</sup> cells occupy different WM territory than Nkx6.1<sup>+</sup> cells.

Scale bars: 50  $\mu$ m in D; 10  $\mu$ m in D',D'',P; 300 $\mu$ m in M; 100  $\mu$ m in Q; 20 $\mu$ m in A-C,R,S.

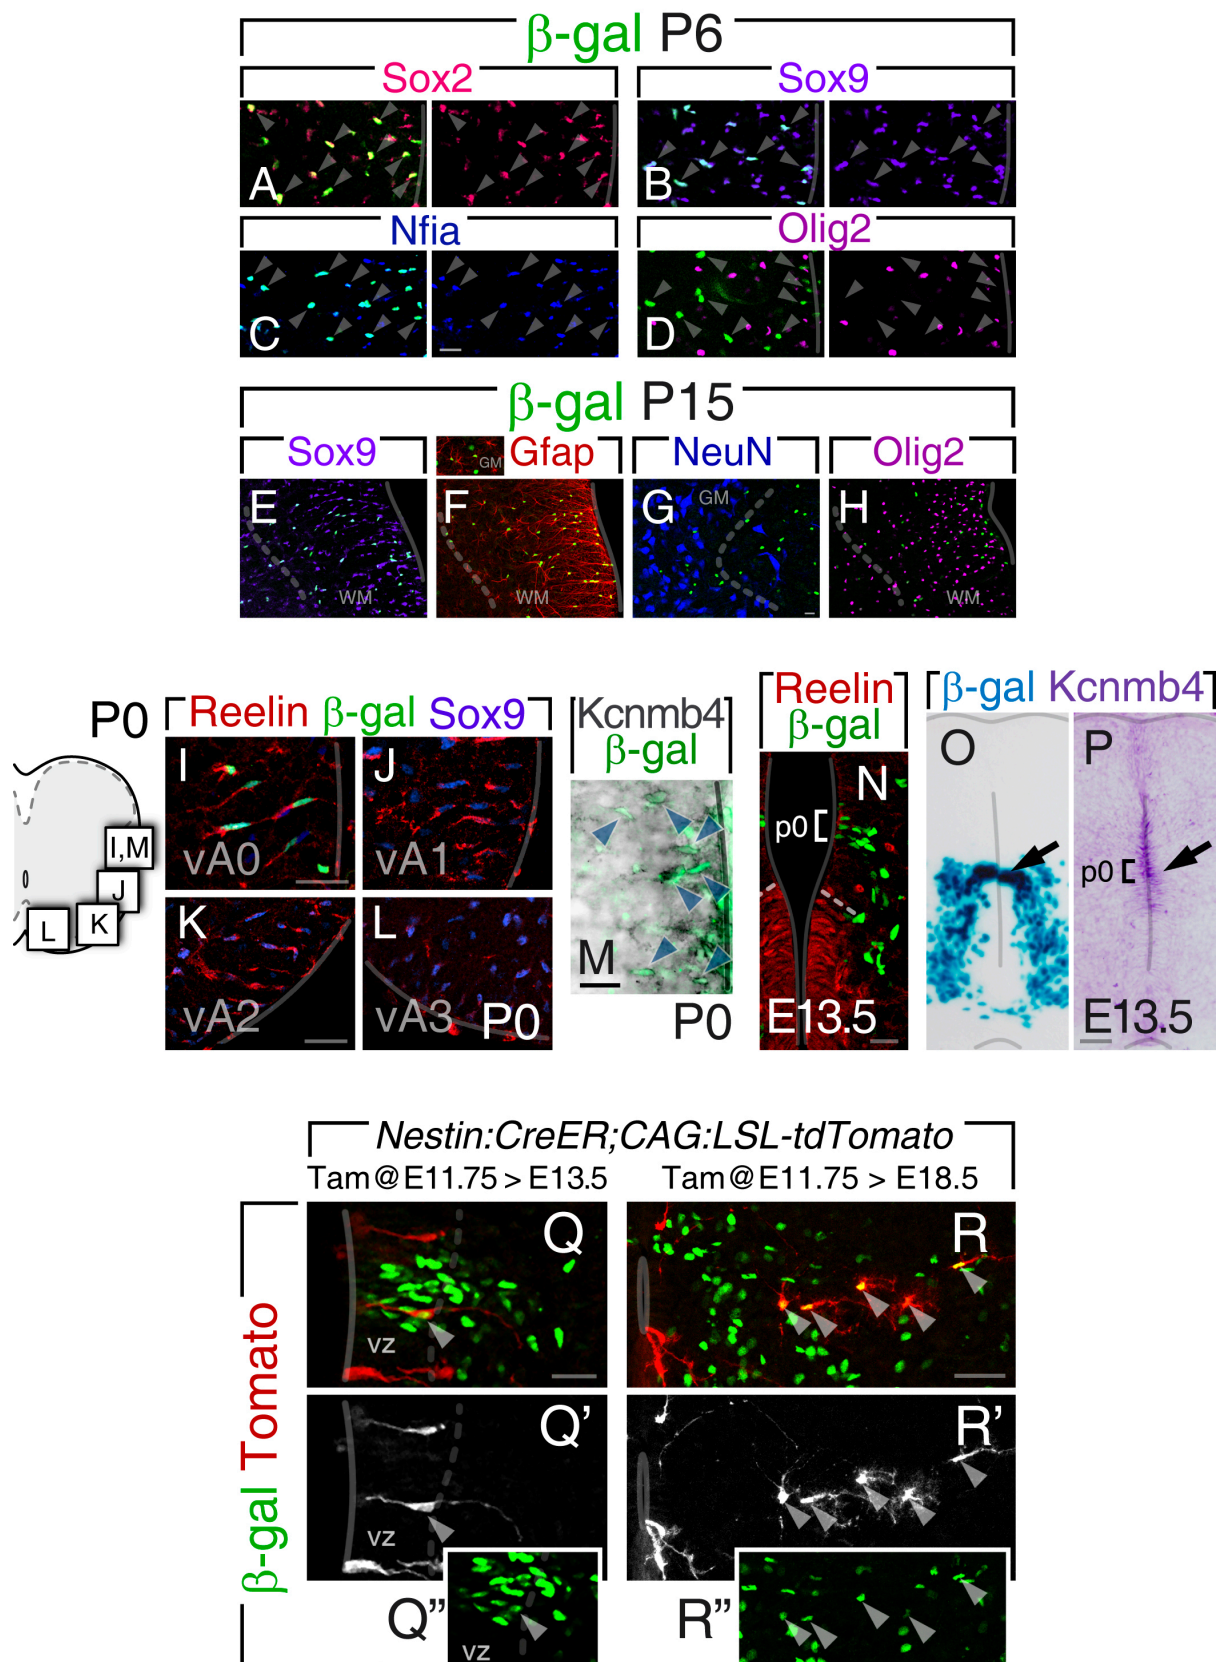

**Fig. S2. Dbx1-derived cells express astroglial molecular markers.**

(A-D) Magnifications of WM region of P6 spinal cord show that  $\beta$ -gal cells express Sox9, Sox2 and Nfia, and are negative for Olig2. Arrowheads point at  $\beta$ -gal cells.

(E-H) P15 spinal cord immunostaining showing  $\beta$ -gal cells in the GM and WM are Sox9- and GFAP-positive but negative for neuronal NeuN and oligodendrytic Olig2.

(I-P) Expression of Reelin in WM vA0, vA1 and vA2 astrocytes at P0. (M) *Kcnmb4* *in situ* hybridization and  $\beta$ -gal staining in the lateral WM. (N) At E13.5, Reelin is present in ventral vz cells but absent in p0  $\beta$ -gal<sup>+</sup> and p1 progenitors. (O-P) *Kcnmb4* is expressed in the p0 vz domain (bracket, arrow) and also in presumed p1 area and dorsal domains.  $\beta$ -gal activity was developed in consecutive sections to identify the p0 region.

(Q-R'') Genetic mosaic labeling strategy. *Nestin:CreER;CAG:LSL-tdTomato;Dbx1<sup>lacZ</sup>/+* embryos were inoculated with low doses of Tam (37.5 mg/kg b.w) at E11.75 to label a sparse number of vz cells. Tissue was collected at E13.5 (Q) and E18.5 (R) and immunostained against  $\beta$ -gal and Tomato. Dotted line in Q-Q'' delimits vz region. Arrowheads point at  $\beta$ -gal<sup>+</sup> cells indelibly labeled with Tomato.

Scale bars: 20  $\mu$ m in A-N,Q; 50  $\mu$ m in P,R.

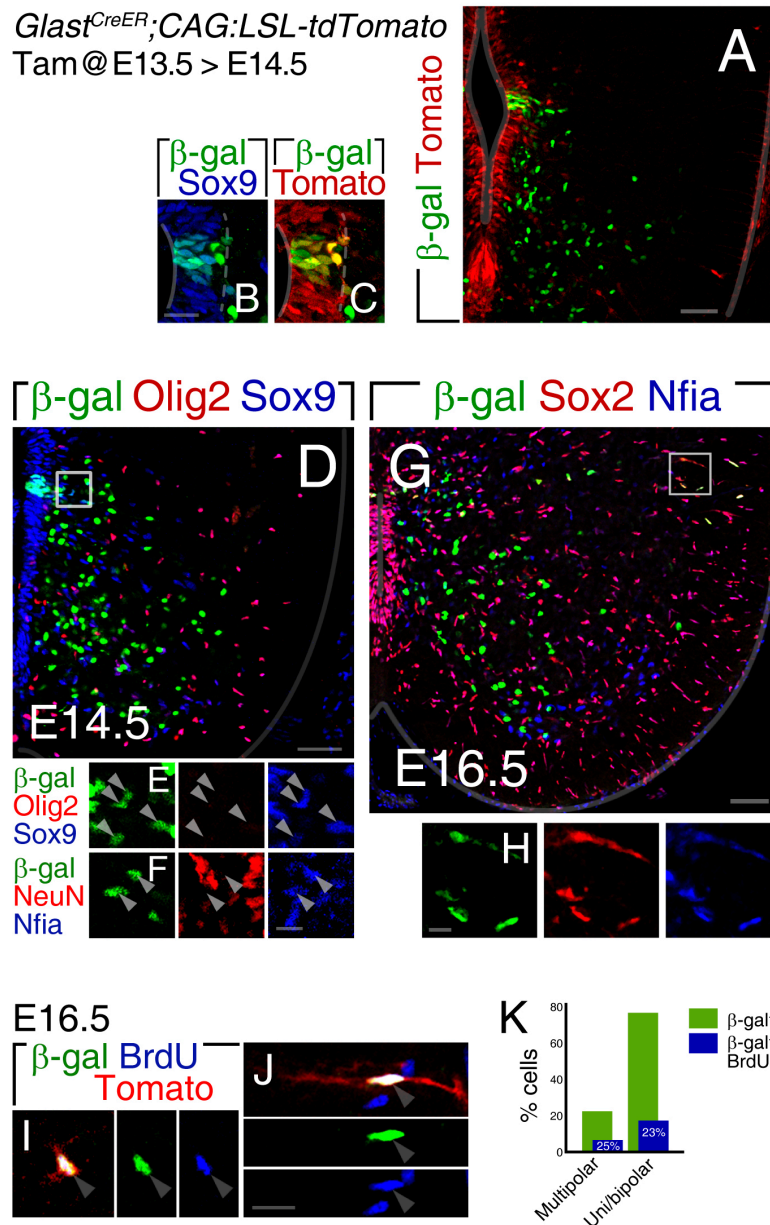

**Fig. S3. Late-born Dbx1-derived cells arise from vz radial glia and express astrocytic markers.**

(A-C) Analysis at E14.5 of *Glast<sup>CreER</sup>;CAG:LSL-tdTomato;Dbx1<sup>lacZ/+</sup>* embryos induced with Tam (150 mg/kg b.w.) at E13.5 indicated efficient indelible labeling of  $\beta$ -gal<sup>+</sup> cells (90±3% tomato<sup>+</sup>) that still reside in the vz (Sox9<sup>+</sup>).

(D-H) During embryonic development Dbx1-derived cells express astroglial markers. (D-F) E14.5 spinal cord section immunostained against  $\beta$ -gal, Sox9, Nfia, Olig2 and NeuN. Magnifications show expression of astroglial markers Sox9 and Nfia but not of oligodendrocytic Olig2 and neuronal NeuN. (G-H) Sox2 and Nfia late-born  $\beta$ -gal<sup>+</sup> cells at E16.5.

(I-K) Cells with multipolar or uni/bipolar morphologies have similar proliferation rates. (I-J). Representative images of BrdU-labeled cells with each shape. (K) Percentages of  $\beta$ -gal astroglia according to their morphology (green bars) and the proportion labeled with BrdU (blue bars) show that ~23-25% of  $\beta$ -gal<sup>+</sup> cells at E16.5 were BrdU<sup>+</sup>, irrespective of their shape.

Scale bars: 50  $\mu$ m in A,D,G; 20  $\mu$ m in B,C; 10  $\mu$ m in E,F,H-J.

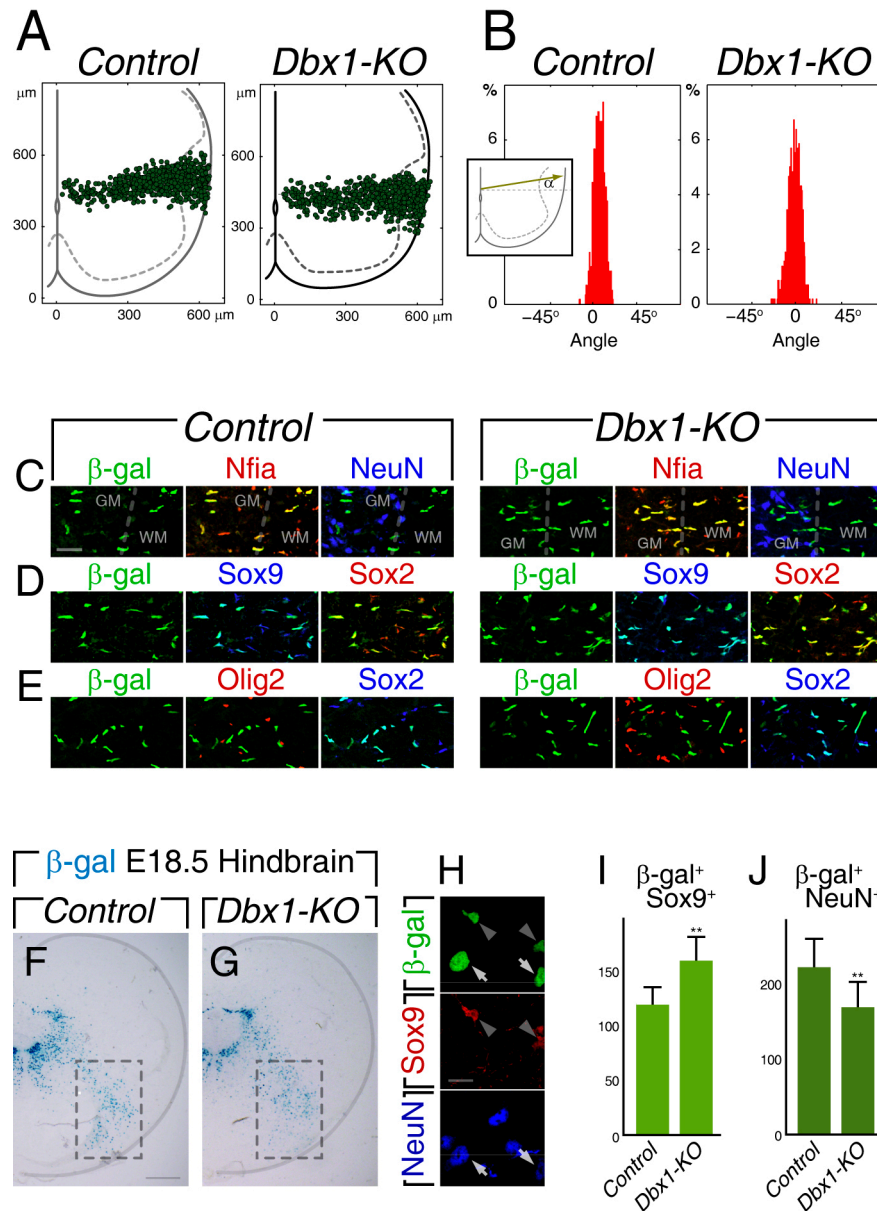

**Fig. S4. Dbx1 controls the size of astroglial vA0 population**

(A) Analysis of p0-derived cells in the E18.5 spinal cord of *Dbx1* mutants. Scattered plot of 650  $\beta\text{gal}^+$ ,  $\text{Sox9}^+$  cells in *control* and 895 cells in *Dbx1-KO* (12 sections, 2 embryos ea.) used to build density maps in Fig. 4E,F. (B) Histograms of angular distributions of  $\beta\text{gal}^+$  astroglial cells rendered a slight ventral shift in mutants ( $\alpha=7.0\pm5.5^\circ$  in *control*,  $\alpha=-0.5\pm6.5^\circ$  in *Dbx1-KO*).

(C-E) Immunohistochemistry of E18.5 spinal cord from *control* and *Dbx1-KO* with antibodies against *Nfia*, *NeuN*, *Sox2*, *Sox9* and *Olig2* shows  $\beta\text{gal}$  cells in the gray and white matter have astroglial identity in both *heterozygous* and *Dbx1* mutants.

(F-J) Dbx1 balances p0-derived astrocytic and neuronal populations in the hindbrain. (F-G) Transverse section of E18.5 hindbrain of control and Dbx1<sup>-/-</sup> developed for  $\beta$ -gal. (H) Neurons and astrocytic cells were identified by Sox9 or NeuN. (I,J) Quantification of  $\beta$ -gal<sup>+</sup>,Sox9<sup>+</sup> and  $\beta$ -gal<sup>+</sup>,NeuN<sup>+</sup> in the ventrolateral medulla (dotted boxes in F,G) showing an increase in astroglial cells in mutants (34 $\pm$ 16% rise, 2 embryos) concomitant with reduction in neurons (24 $\pm$ 6 % decrease), (7 sections, 2 embryos, \*\*p<0.01, Mann Whitney test).

Scale bars: 300 $\mu$ m in F,G; 20 $\mu$ m in C-E; 10 $\mu$ m in H. Data: mean $\pm$ SD.

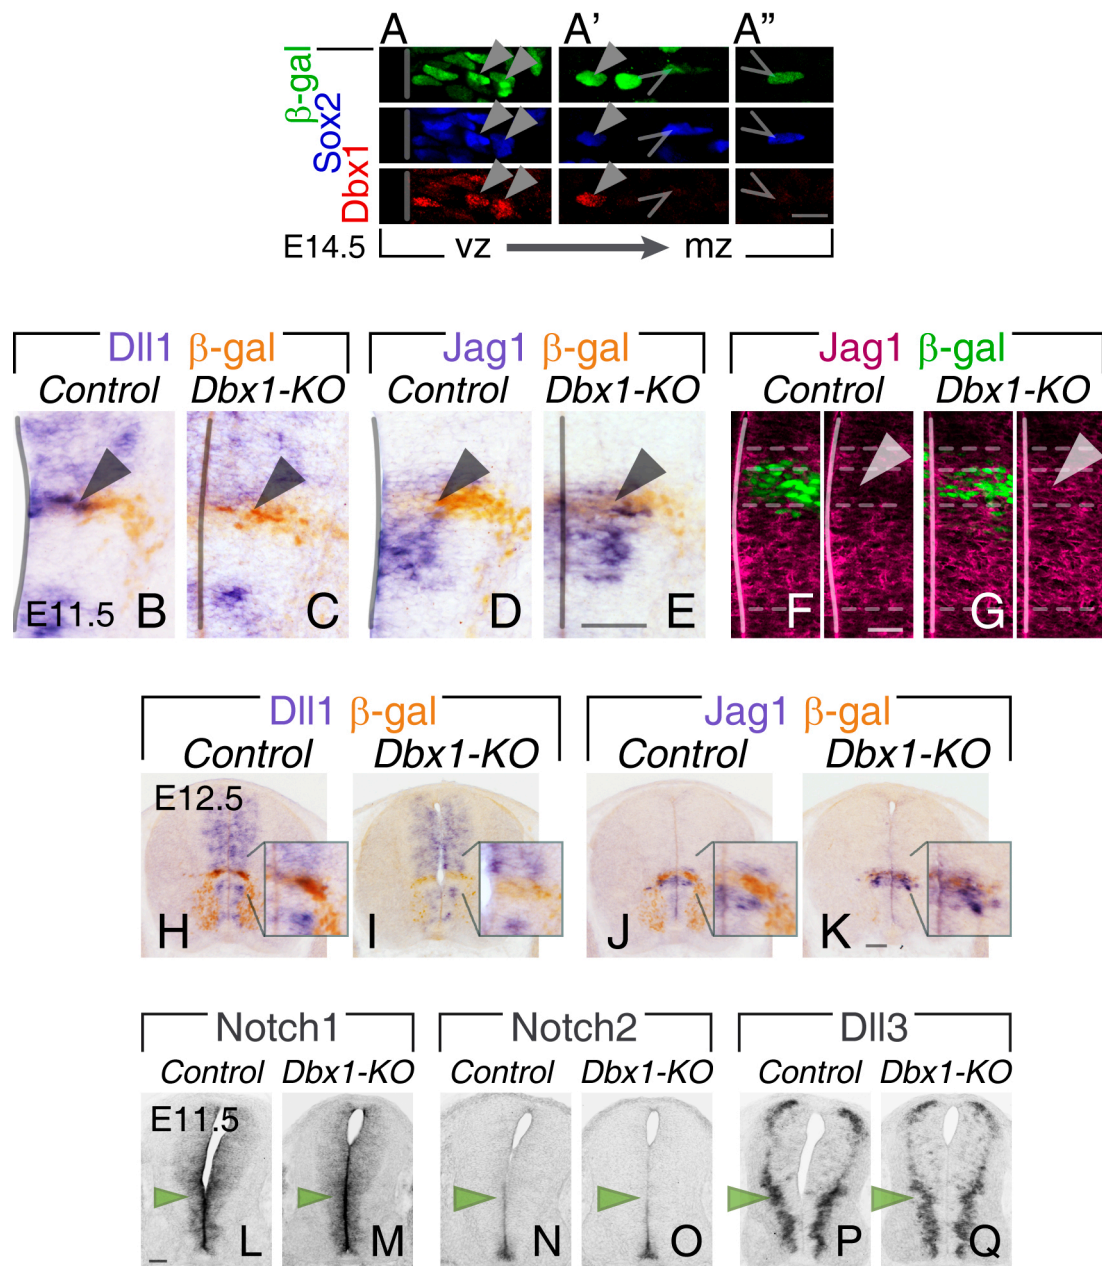

**Fig. S5. *Dbx1* regulates Notch signaling factors during the neurogenic developmental phase.**

(A-A'') *Dbx1* is expressed in vz progenitors but absent in astrocyte precursors in the mantle zone (mz). Immunostainings for *Dbx1*,  $\beta$ -gal and Sox2 at E14.5 in the vz (A), the transition from the vz to the mz (A') and astrocytic cells in the mz (A''). Filled arrowheads point out *Dbx1*<sup>+</sup> cells within or leaving the vz, while empty arrowheads mark  $\beta$ -gal<sup>+</sup>, Sox2<sup>+</sup> cells migrating in the mz lacking *Dbx1*.

(B-K) Dll1 and Jag1 are altered in Dbx1 mutants. In situ hybridization for Dll1 and Jag1 ligands combined with  $\beta$ -gal immunostaining on control and Dbx1<sup>-/-</sup> neural tube sections at E11.5 (B-E) and E12.5 (H-K). Immunohistochemistry for Jag1 and  $\beta$ -gal in E11.5 control and Dbx1 mutants. Arrowheads in B-G point at the p0 progenitor domain. Insets in H-K are magnifications of the p0 domain.

(L-Q) *In situ* hybridization of Notch1 and Notch2 receptors, showing similar expression patterns in E11.5 *Control* and *Dbx1-KO* embryos. *In situ* hybridization with Dll3 probe shows a reduced expression at the ventricular-mantle zone boundary at the level of the p0 domain in *Dbx1-KOs*. Arrowheads point to the p0 progenitor region determined by  $\beta$ -gal activity in consecutive sections.

Scale bars: 10 $\mu$ m in A-A", 50 $\mu$ m in B-E, H-Q; 20 $\mu$ m in F,G.
